# Supplementary material for: Passivating the vacancy defects of CsPbCl3 polycrystalline films by a Cl-containing ionic liquid for self-powered, charge-transport-layer-free UV photodetectors
Source: Royal Society of Chemistry journal article supplement (doi:10.1039/d2tc00080f), 2022-01-01
Supplement: d2tc00080f1.pdf [file d2tc00080f1.pdf]

## Supporting Information

### **Passivating the Vacancy Defects of CsPbCl<sub>3</sub> Polycrystalline Films by a Cl-Containing Ionic Liquid for Self-Powered, Charge-Transport-Layer-Free UV Photodetectors**

Siyi Cheng<sup>a</sup>, Xin Zheng<sup>c</sup>, Zeliang Hou<sup>a</sup>, Ruyi Hu<sup>a</sup>, Shulan Jiang<sup>a</sup>, Shuang Xi<sup>b</sup>, Guojun Wen<sup>a\*</sup>, Xingyue Liu<sup>a\*</sup>

<sup>a</sup> *School of Mechanical Engineering and Electronic Information, China University of Geosciences (Wuhan), Wuhan 430074, China*

<sup>b</sup> *School of Mechanical and Electronic Engineering, Nanjing Forestry University, Nanjing 210037, China*

<sup>c</sup> *Michael Grätzel Center for Mesoscopic Solar Cells, Wuhan National Laboratory for Optoelectronics, Huazhong University of Science and Technology, Wuhan, Hubei, China*

\* Address correspondence to (X. Liu) [liuxingyue@cug.edu.cn](mailto:liuxingyue@cug.edu.cn); (G. Wen) [wenguojun@cug.edu.cn](mailto:wenguojun@cug.edu.cn).

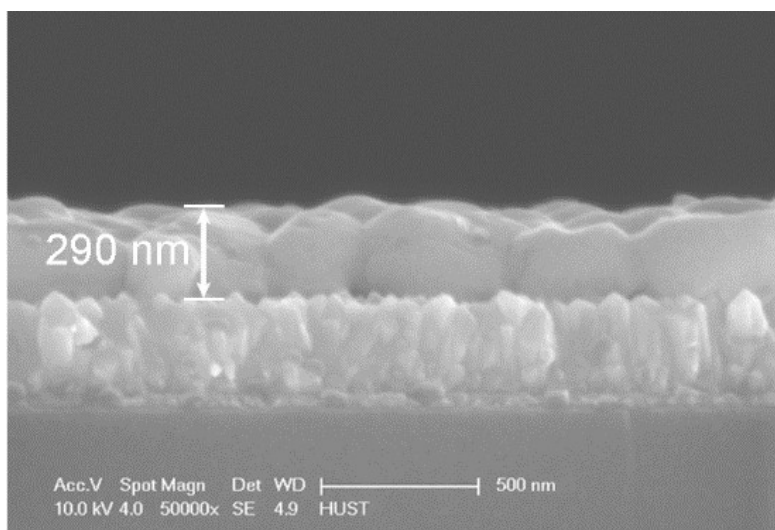

**Fig. S1** The cross-sectional SEM image of the CsPbCl<sub>3</sub> film.

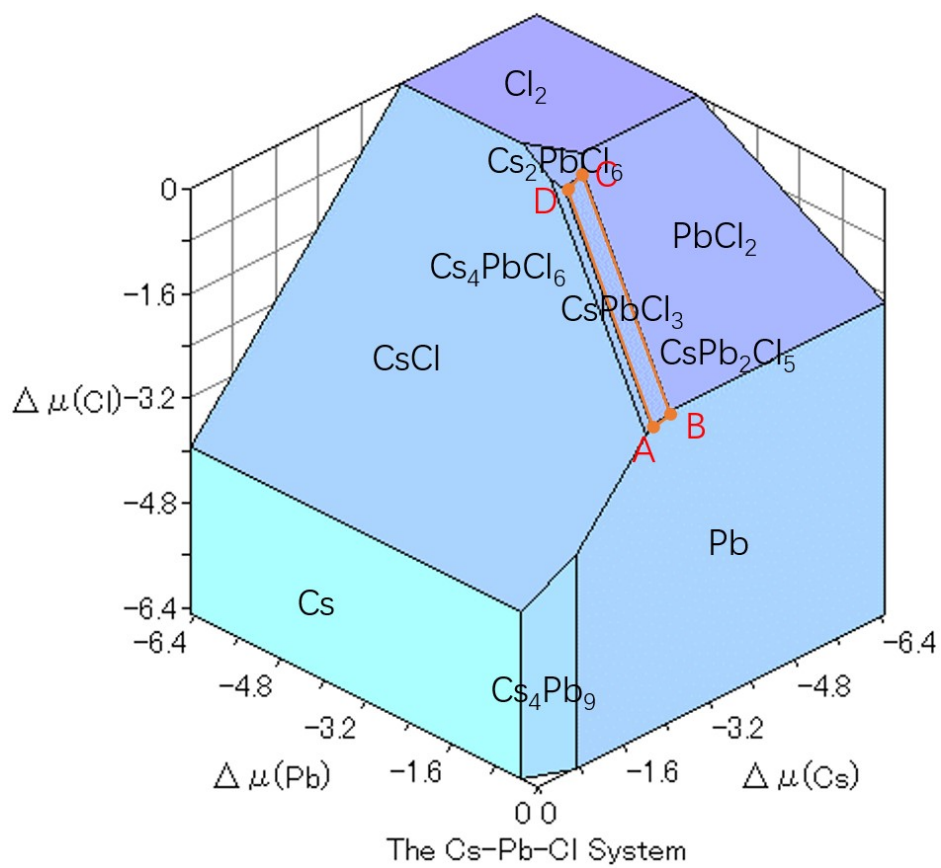

**Fig. S2** The calculated chemical phase diagram of the Cs-Pb-Cl system.

---

**Table S1** The total energies ( $E_{\text{total}}$ ), crystal system, and space group of Cs-Pb-Cl and possible phases.

| Formula                           | $E_{\text{Bulk}}$ (eV) | Crystal system | Space Group                |
|-----------------------------------|------------------------|----------------|----------------------------|
| Cs                                | -0.843                 | Cubic          | $Im3m$ (229)               |
| Pb                                | -3.550                 | cubic          | Fm3m [225]                 |
| Cl <sub>2</sub> (g)               | -1.838                 | -              | -                          |
| CsCl                              | -6.639                 | cubic          | Fm3m [225]                 |
| PbCl <sub>2</sub>                 | -10.719                | tetragonal     | P4 <sub>2</sub> /mnm [136] |
| Cs <sub>4</sub> Pb <sub>9</sub>   | -38.201                | monoclinic     | P2 <sub>1</sub> /c [14]    |
| CsPbCl <sub>3</sub>               | -17.620                | tetragonal     | P4/mbm [127]               |
| Cs <sub>2</sub> PbCl <sub>6</sub> | -28.415                | cubic          | Fm3m [225]                 |
| CsPb <sub>2</sub> Cl <sub>5</sub> | -28.347                | tetragonal     | I4/mcm [140]               |
| Cs <sub>4</sub> PbCl <sub>6</sub> | -37.666                | trigonal       | R3c [167]                  |

---

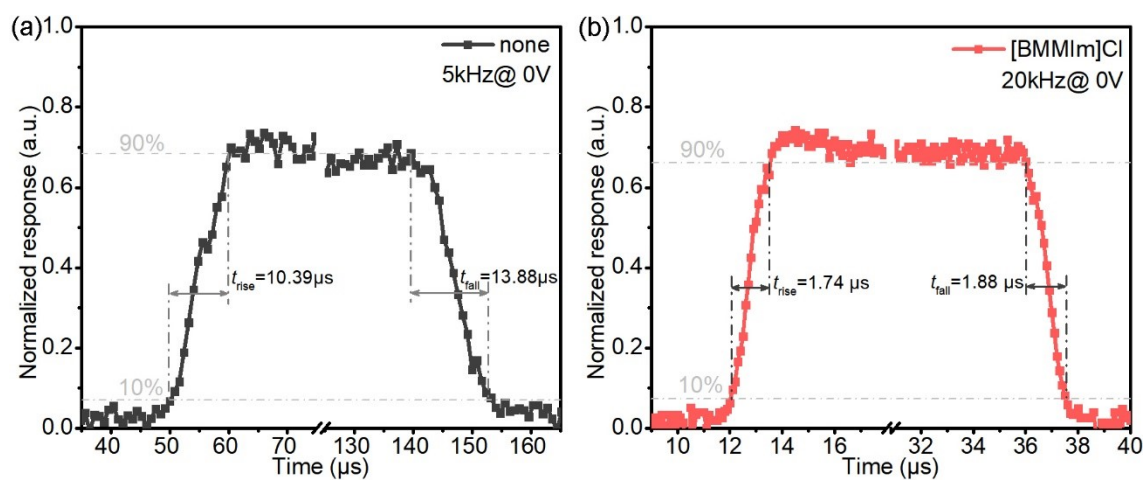

**Fig. S3** The amplified  $I_{\text{ph-t}}$  curves of the (a) non-modified and (b) [BMMIm]Cl-modified photodetectors.

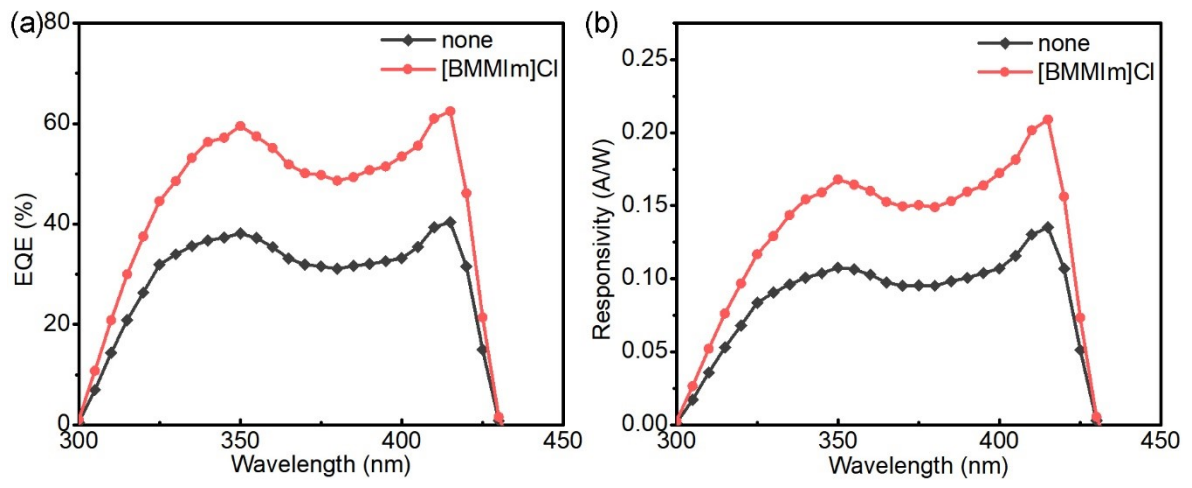

**Fig. S4** (a) The EQE and (b) calculated responsivity of the non-modified and [BMMIm]Cl-modified PDs.
